# Supplementary material for: Persistent Homology Analysis of the Microstructure of Laser-Powder-Bed-Fused Al–12Si Alloy
Source: MDPI journal article supplement (doi:10.3390/ma16227228), 2023-11-18
Supplement: s1 [file s1]

## Supplementary materials

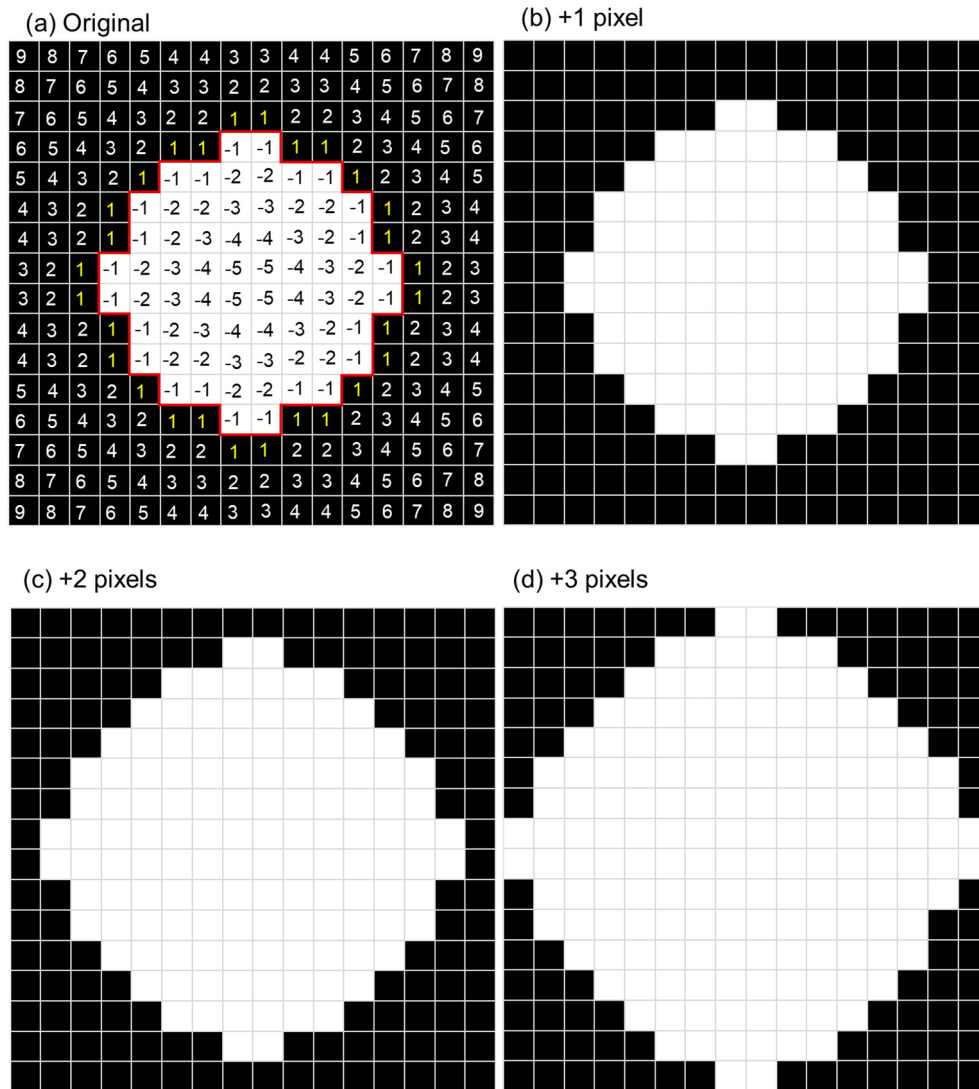

**Figure S1.** Images showing the thickening behaviors during the persistent homology analysis: (a) original image and the images thickened by (b) +1 pixel, (c)+2 pixels, and (d) +3 pixels. The numbers in the pixels shown in (a) indicate the Manhattan distance from the red line.
